# Supplementary material for: Systems Nutrology of Persons with Tuberculosis Identifies Specific Dietary Profiles Associated with Dysglycemia
Source: Research Square preprint supplement (doi:10.21203/rs.3.rs-334329/v2), 2021-07-14
Supplement: Supplementary file 1 [file 0ef8ca9b78a26b81aaf7f915.docx]

**Supplementary Material**

**Supplementary Table 1.** R packages used for analysis.

| Package | Analysis |
| --- | --- |
| compareGroups v4.4.3 | Comparison tests |
| ComplexHeatmap v2.2.0 | Unsupervised hierarchical cluster analysis |
| Hmisc v4.4.1 | Spearman rank test |
| ggplot2 v3.3.2 | Data visualization |

**Table Note:** The packages were used in Rstudio v 1.1.463, with R language v3.4.2.

**Supplementary Table 2.** Characteristics of the study population according dietary patterns.

| **Parameter** | **Dietary Pattern 1** | | **Dietary Pattern 2** | | **Dietary Pattern 3** |  |
| --- | --- | --- | --- | --- | --- | --- |
|  | **n=104** | | **n=74** | | **n=91** | **P value** |
| **Clinical groups, n. (%)** |  |  | |  | | **<0.001** |
| **Healthy** | 18 (17.3) | 66 (89.2) | | 1 (1.10) | |  |
| **Dysglycemia** | 12 (11.5) | 8 (10.8) | | 28 (30.8) | |  |
| **TB** | 71 (68.3) | 0 (0.00) | | 4 (4.40) | |  |
| **TB Dysglycemia** | 3 (2.88) | 0 (0.00) | | 58 (63.7) | |  |
| **Age (years), median (IQR)** | 26.4 (21.0 - 37.0) | | 36.9 (23.5 - 48.8) | | 45.9 (30.5 - 54.0) | **<0.001** |
| **Male, n. (%)** | 57 (54.8) | | 25 (33.8) | | 55 (60.4) | **0.002** |
| **Illiteracy, n. (%)** | 34 (32.7) | | 14 (18.9) | | 11 (12.1) | **0.002** |
| **Prior TB, n. (%)** | 14 (13.5) | | 8 (10.8) | | 15 (16.5) | 0.571 |
| **Smoking, n. (%)** | 17 (16.3) | | 11 (14.9) | | 20 (22.2) | 0.411 |
| **Passive smoking, n. (%)** | 9 (8.65) | | 10 (13.5) | | 11 (12.2) | 0.557 |
| **Cannabis use, n. (%)** | 13 (12.5) | | 0 (0.00) | | 10 (11.1) | **0.008** |
| **Illicit drug use, n. (%)** | 8 (7.69) | | 0 (0.00) | | 10 (11.1) | **0.005** |
| **Alcohol use, n. (%)** | 40 (38.5) | | 26 (35.1) | | 52 (57.8) | **0.005** |
| **Anemia, n. (%)** | 62 (59.6) | | 26 (35.1) | | 53 (58.24) | **<0.001** |
| **BMI (kg/m2), median (IQR)** | 22.3 (20.2 - 24.5) | | 27.4 (25.3 - 30.1) | | 25.4 (22.7 - 29.6) | **<0.001** |
| **Waist (cm), median (IQR)** | 79.5 (74.0 - 87.2) | | 90.0 (83.2 - 98.8) | | 89.0 (82.0 - 98.0) | **<0.001** |
| **Hb (g/dL), median (IQR)** | 12.6 (11.6 - 13.6) | | 13.1 (12.4 - 14.2) | | 12.5 (11.1 - 13.7) | **0.014** |
| **FPG (g/dL), median (IQR)** | 91.8 (86.2 - 96.8) | | 91.8 (88.6 - 96.1) | | 104 (99.0 - 114) | **<0.001** |
| **HbA1c (%), median (IQR)** | 5.00 (4.70 - 5.30) | | 5.05 (4.62 - 5.30) | | 5.30 (4.90 - 5.90) | **<0.001** |

**Table Note:** The data presented in continuous variables (represented median and interquartile range [IQR]) between clinical groups were compared using the Kruskal-Wallis test with Dunn’s multiple comparisons post-test. Qualitative variables were represented by number and frequency (%) and compared using the Pearson’s chi-square test. p-values were adjusted for multiple measurements using the Holm-Bonferroni method.

TB: tuberculosis; TB TMG: tuberculosis and dysglycemia; BMI: body mass index; Hb: Hemoglobin; HbA1c: glycated hemoglobin.

**Supplementary** **Table 3.** Relative abundance of food group consumption according dietary pattern.

| **Relative abundance by food group (%)** | **Dietary Pattern 1**  **n=104** | **Dietary Pattern 2**  **n=74** | **Dietary Pattern 3**  **n=91** | **P value** |
| --- | --- | --- | --- | --- |
| **Rice and cereals** | 0.52 (0.48 - 0.56) | 0.47 (0.42 - 0.49) | 0.41 (0.37 - 0.45) | **<0.001** |
| **Tubers** | 0.21 (0.18 - 0.23) | 0.18 (0.16 - 0.19) | 0.18 (0.16 - 0.19) | **<0.001** |
| **Milk and dairy** | 139 (69.3 - 213) | 34.7 (34.7 - 61.3) | 88.0 (42.7 - 213) | **<0.001** |
| **Fruits and Vegetables** | 0.01 (0.01 - 0.03) | 0.06 (0.03 - 0.08) | 0.01 (0.01 - 0.02) | **<0.001** |
| **Legumes** | 0.02 (0.01 - 0.02) | 0.04 (0.03 - 0.05) | 0.01 (0.01 - 0.01) | **<0.001** |
| **Meat** | 0.03 (0.03 - 0.04) | 0.05 (0.04 - 0.06) | 0.03 (0.02 - 0.04) | **<0.001** |
| **Fast Food** | 0.06 (0.03 - 0.09) | 0.05 (0.03 - 0.07) | 0.09 (0.05 - 0.21) | **<0.001** |
| **Sweetened beverages** | 0.03 (0.01 - 0.07) | 0.03 (0.00 - 0.08) | 0.10 (0.04 - 0.15) | **<0.001** |
| **Sugar and sweets** | 0.02 (0.01 - 0.02) | 0.02 (0.01 - 0.02) | 0.02 (0.01 - 0.03) | 0.212 |
| **Oils** | 0.00 (0.00 - 0.01) | 0.01 (0.00 - 0.01) | 0.01 (0.00 - 0.01) | **<0.001** |

**Table Note:** The data presented in continuous variables (represented median and interquartile range [IQR]) between food groups were compared using the Kruskal-Wallis test with Dunn’s multiple comparisons post-test.

**Supplementary** **Table 4.** Spearman correlations coefficients

|  | **Fasting Plasma Glucose (g/dL)** | | | |  | **Glycated Hemoglobin (%)** | | | |
| --- | --- | --- | --- | --- | --- | --- | --- | --- | --- |
|  | **Without TB (n=133)** | | **With TB (n=136)** | |  | **Without TB (n=133)** | | **With TB (n=136)** | |
|  | **Spearman rho** | **p value** | **Spearman rho** | **p value** |  | **Spearman rho** | **p value** | **Spearman rho** | **p value** |
| **Rice and Cereal** | 0.580 | <0.001 | 0.478 | <0.001 |  | 0.28 | <0.001 | 0.376 | <0.001 |
| **Tubers** | 0.682 | <0.001 | 0.409 | <0.001 |  | 0.31 | <0.001 | 0.356 | <0.001 |
| **Sweetened beverages** | -0.035 | 0.688 | 0.364 | <0.001 |  | 0.04 | 0.681 | 0.396 | <0.001 |
| **Fast Food** | 0.225 | 0.009 | 0.523 | <0.001 |  | -0.01 | 0.911 | 0.325 | <0.001 |
| **Milk** | 0.303 | <0.001 | 0.236 | 0.005 |  | 0.09 | 0.323 | -0.278 | <0.001 |
| **Fruits and Vegetables** | -0.281 | 0.001 | 0.407 | <0.001 |  | -0.05 | 0.595 | 0.301 | <0.001 |
| **Meat** | 0.183 | 0.035 | 0.220 | 0.009 |  | 0.14 | 0.114 | 0.393 | <0.001 |
| **Legumes** | -0.556 | <0.001 | -0.300 | <0.001 |  | -0.23 | 0.007 | 0.268 | <0.001 |
| **Sugar and Sweets** | 0.003 | 0.969 | 0.431 | <0.001 |  | -0.10 | 0.255 | 0.151 | 0.081 |
| **Oils** | 0.434 | <0.001 | 0.501 | <0.001 |  | 0.16 | 0.059 | 0.273 | 0.001 |

**Table Note:** The data correspond to Spearman rho coefficients between food groups and fasting plasma glucose (left) or glycated hemoglobin (right). To be considered significant, the correlation must have |rho| > 0.45 and p value < 0.05.
